## Cerebral blood flow predicts multiple demand network activity and fluid intelligence across the lifespan

SHUYI WU<sup>1,2</sup>, LORRAINE K. TYLER<sup>1</sup>, RICHARD N.A. HENSON<sup>3</sup>, JAMES B. ROWE<sup>3,4</sup>, CAM-CAN<sup>1,4</sup>, KAMEN A. TSVETANOV<sup>1,4,\*</sup>

\* Corresponding author ([kat35@cam.ac.uk](mailto:kat35@cam.ac.uk), +44 1223 766 556)

<sup>1</sup> Centre for Speech, Language and the Brain, Department of Psychology, University of Cambridge, Cambridge, UK

<sup>2</sup> Department of Management, School of Business, Hong Kong Baptist University, Hong Kong, China

<sup>3</sup> Medical Research Council Cognition and Brain Sciences Unit, Department of Psychiatry, Cambridge, UK

<sup>4</sup> Department of Clinical Neurosciences, University of Cambridge, Cambridge, UK

---

### Abstract:

The preservation of cognitive function into old age is a public health priority. Cerebral hypoperfusion is a hallmark of dementia but its impact on maintaining cognitive ability across the lifespan is less clear. We investigated the relationship between baseline cerebral blood flow (CBF) and blood oxygenation level-dependent (BOLD) response during a fluid reasoning task in a population-based adult lifespan cohort (N=227, age 18-88 years). As age differences in baseline CBF could lead to non-neuronal contributions to the BOLD signal, we introduced commonality analysis to neuroimaging, in order to dissociate performance-related CBF effects from the physiological confounding effects of CBF on the BOLD response. Accounting for CBF, we confirmed that performance- and age-related differences in BOLD responses in the multiple-demand network (MDN) implicated in fluid reasoning. Differences in baseline CBF across the lifespan explained not only performance-related BOLD responses, but also performance-independent BOLD responses. Our results suggest that baseline CBF is important for maintaining cognitive function, while its non-neuronal contributions to BOLD signals reflect an age-related confound. Maintaining perfusion into old age may serve to support brain function with behavioural advantage, regulating brain health.

**Keywords** (up to five): *ageing, functional magnetic resonance imaging (fMRI), cerebral blood flow, multiple demand network, commonality analysis*

---

## 1 1. Introduction

2  
3 The world's population is ageing, with every sixth person expected to be over 65 by 2050  
4 (United Nations, 2020). Cognitive decline has emerged as a major health threat in old age,  
5 including but not limited to dementia (Piguet et al., 2009; Yarchoan et al., 2012). To combat this  
6 threat, there is increasing demand to identify factors that facilitate the maintenance of cognitive  
7 function across the lifespan. Ageing causes changes to our brains in vascular, structural and  
8 functional domains (Kennedy and Raz, 2015; Cabeza et al., 2018). However, these effects are  
9 normally reported separately, and only through their integration one can better understand how  
10 these domains influence cognitive decline in old age (Tsvetanov et al., 2021).

11 Cerebral blood flow (CBF) changes early in experimental models of dementia, leading to  
12 neuronal dysfunction, and loss independently of amyloid- $\beta$ -dependent contributions (Iadecola,  
13 2004; Zlokovic, 2011; Kisler et al., 2017; Sweeney et al., 2018, 2019). In healthy ageing, previous  
14 reports have linked the effects of age on baseline CBF to behavioural performance measured  
15 outside of the scanner (Bangen et al., 2014; Hays et al., 2017; Leeuwis et al., 2018). However,  
16 brain perfusion measurements are highly dependent on other physiological factors such as  
17 autoregulation modulators (Lemkuil et al., 2013), medication, time of day, levels of wakefulness  
18 (Patricia et al., 2014), physical exercise, caffeine or smoking before the scan (Domino et al., 2004;  
19 Addicott et al., 2009; Merola et al., 2017). Therefore, differences in CBF signal may reflect an age-  
20 related bias in such factors, rather than a true baseline difference in CBF (Grade et al., 2015).  
21 Moreover, it remains unclear whether the observed CBF dysregulation in ageing reflects a link  
22 between somatic differences in vascular health and global cognition, or whether CBF modifies  
23 regional brain activations underlying specific cognitive processes. To understand the role of  
24 baseline CBF in cognitive ageing, one must also test whether baseline CBF is associated with  
25 performance-related brain activity during cognitive tasks.

26 The field of neurocognitive ageing research has often used functional magnetic resonance  
27 imaging (fMRI) to study age differences in brain activity during cognitive tasks. fMRI data are  
28 usually interpreted in terms of neuronal activity, but the blood oxygenation level-dependent  
29 (BOLD) signal measured by fMRI also reflect vascular differences and neurovascular coupling  
30 (Mishra et al., 2021), which changes with age (Tsvetanov et al., 2021). Failure to account for  
31 vascular health alterations leads to misinterpretation of fMRI BOLD signals (Hutchison et al.,  
32 2013; Liu et al., 2013; Tsvetanov et al., 2015) and their cognitive relevance (Geerligts and  
33 Tsvetanov, 2016; Tsvetanov et al., 2016; Geerligts et al., 2017). Several approaches exist to  
34 separate vascular from neural contributions to the BOLD signals, including the use of baseline  
35 CBF to normalise for age differences in cerebrovascular function (Tsvetanov et al., 2021).  
36 Normalisation with baseline CBF would improve detection of "true" neuronal changes i.e., over  
37 and above age-related differences in non-neuronal physiology. This would control for  
38 behaviourally irrelevant *confounding effects*, and *performance-related effects* where cerebral  
39 hypoperfusion reflects neuronal function and loss. Therefore, it would be better to integrate,  
40 not simply control for, baseline CBF differences in task-based BOLD studies to dissociate  
41 confounding from performance-related effects of CBF on age-related differences in the BOLD  
42 fMRI responses.

43 To distinguish confounding from performance effects of CBF is important to understand  
44 the neuronal substrates of multiple cognitive demands with ageing (Kaufman and Horn, 1996;  
45 Salthouse, 2012; Kievit et al., 2014). Demanding, complex or executive functions depend on a  
46 distributed network of brain regions known as the multiple-demand network (MDN), which is  
47 readily activated during tasks used to assess fluid intelligence (Crittenden et al., 2016;  
48 Tschentscher et al., 2017; Woolgar et al., 2018). The MDN parses complex tasks into  
49 subcomponents or sub-goals (Duncan, 2013; Camilleri et al., 2018). There is substantial spatial  
50 overlap between MDN and the brain regions with impaired baseline CBF in ageing (Tsvetanov et  
51 al., 2020b, 2021). Therefore, some of the age differences in MDN and cognition (Tsvetanov et al.,  
52 2016; Samu et al., 2017) may reflect confounding and/or performance-related effects of CBF  
53 dysregulation.

54 To characterise neurocognitive ageing, we propose the use of commonality analysis to  
55 dissociate *confounding* from *performance-related* effects of CBF on age-related differences in  
56 brain functional measures. Commonality analysis, unlike the normalisation approach, allows for  
57 adjustment of multiple variables simultaneously by identifying the variance in a dependent  
58 variable associated with each predictor uniquely, as well as the variance in common to two or  
59 more predictors (Nimon et al., 2008; Kraha et al., 2012). Here, we identify unique and common  
60 effects of age, performance, and baseline CBF on fMRI BOLD responses during a fluid reasoning  
61 task in a population-based adult lifespan cohort (age 18-88, N = 227, [www.camcan.org](http://www.camcan.org)).  
62 Reasoning was measured by the common Cattell task of fluid intelligence, which requires solving  
63 a number of problems, and is known to decline dramatically with age (Kievit et al., 2014).

64 We predicted that the integration of baseline CBF with task-based fMRI BOLD would  
65 improve detection of confounding and performance-related effects of CBF associated with  
66 reasoning. Performance-related effects of CBF would be indicated by variance in the BOLD  
67 response that is common to age, task performance and CBF, whereas confounding effects of CBF  
68 would be indicated by variance that is common to age and CBF, but not shared with performance.

## 69 2. Methods

### 70 2.1. Participants

71 Figure 1 illustrates the study design, data processing and analysis pipeline. The data were  
72 acquired from Phase 3 of the Cambridge Centre for Aging and Neuroscience (Cam-CAN), a large  
73 population-based study of the healthy adult life span (Shafto et al., 2014; Taylor et al., 2015). The  
74 ethical approval for the study was approved by the Cambridge 2 Research Ethics Committee and  
75 written informed consent was provided by all participants. Exclusion criteria included poor  
76 hearing (a sensitive threshold of 35 dB at 1000 Hz in both ears) and poor vision (below 20/50 on  
77 the Snellen test; Snellen, 1862), low Mini-Mental Status Examination (Folstein et al., 1975), self-  
78 reported substance abuse as assessed by the Drug Abuse Screening Test (Skinner, 1982),  
79 significant psychiatric disorders (e.g., schizophrenia, bipolar disorder, personality disorder), or  
80 neurological diseases (e.g. a history of stroke, epilepsy, traumatic brain injury). Demographic  
81 characteristics of the sample are described in Table 1.

82

83

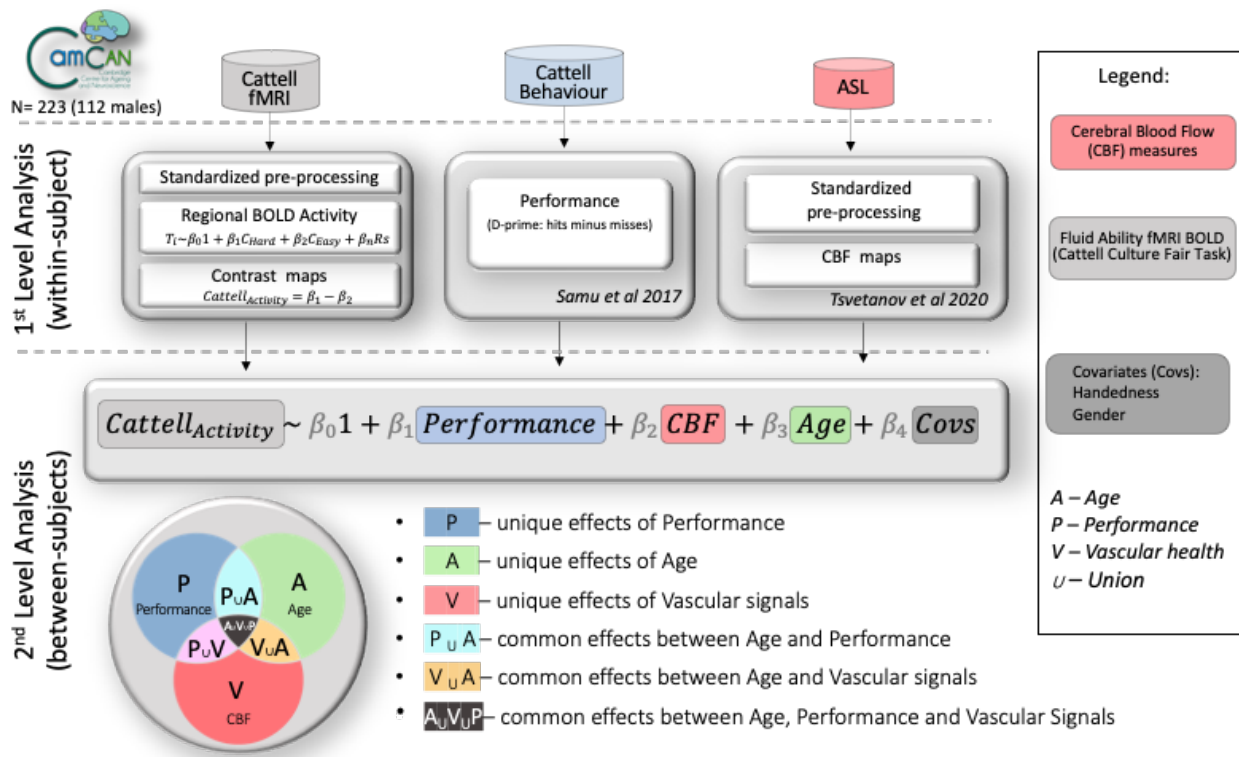

84  
85

Figure 1. Summary of the analytical pipeline.

86  
87

## 2.2. Stimuli, task and procedure

88  
89  
90  
91  
92  
93  
94  
95  
96  
97  
98  
99  
100  
101  
102  
103  
104

Participants undertook a Fluid Intelligence task which draws on critical cognitive process of fluid reasoning, which underlies many complex cognitive operations (Duncan, 2013), and which declines with age (Horn and Cattell, 1967; Kaufman and Horn, 1996; Salthouse et al., 2003; Duncan, 2010; Salthouse, 2012; Kievit et al., 2014). We used a simplified version of the Cattell Culture Fair test (Cattell, 1971), modified to be used in the scanner (Woolgar et al., 2013; Samu et al., 2017). On each trial, participants were presented with a display of four patterns and had to select the “odd one out”. The task employed a block design, with 30-seconds blocks of trials alternating between two conditions with different difficulty level (“easy” and “hard” puzzles). There was a total of four blocks per condition. Because there was a fixed time to perform as many trials as possible, behavioural performance was measured by subtracting the number of incorrect trials from the number of correct trials (averaged over hard and easy blocks, following Samu et al., (2017), i.e. to ensure that someone responding quickly but randomly did not score highly. The suitability of this performance score was confirmed by its strong correlation (Pearson’s  $r$ [95% CI]:  $r(223) = 0.70$  [0.63, 0.76],  $P < 0.001$ ) with scores obtained from the full version of the Cattell test, administered outside the scanner at stage 2 of Cam-CAN (Shafto et al., 2014). We also excluded  $n = 28$  participants who had disproportionately poor performance with 10 or more incorrect trials

105 (17 females, with age range 31-88); leaving N = 223 remaining (111 females, age range 19 - 87  
106 years).

107

### 108 2.3. MRI Acquisition and Preprocessing

109 Imaging data were acquired using a 3T Siemens TIM Trio System with a 32-channel head-  
110 coil at the MRC Cognition and Brain sciences Unit (CBU; [www.mrc-cbu.cam.ac.uk](http://www.mrc-cbu.cam.ac.uk)). Of the initial  
111 cohort, 256 participants had valid T1, T2, arterial spinning labelling (ASL) data, and task-induced  
112 BOLD data from a fluid intelligence task.

113 A 3D-structural MRI was acquired on each participant using T1-weighted sequence  
114 (Generalized Auto-calibrating Partially Parallel Acquisition (GRAPPA) with the following  
115 parameters: repetition time (TR) = 2,250 ms; echo time (TE) = 2.99 ms; inversion time (TI) = 900  
116 ms; flip angle  $\alpha = 9^\circ$ ; field of view (FOV) =  $256 \times 240 \times 192 \text{ mm}^3$ ; resolution = 1 mm isotropic;  
117 accelerated factor = 2; acquisition time, 4 min and 32 s.

118 We used Release003 of the CamCAN Automatic Analysis pipelines for Phase III data  
119 (Taylor et al.,(2015), which called functions from SPM12 (Wellcome Department of Imaging  
120 Neuroscience, London, UK). The T1 image from Phase II was rigid-body coregistered to the MNI  
121 template, and the T2 image from Phase II was then rigid-body coregistered to the T1 image. The  
122 coregistered T1 and T2 images were used in a multimodal segmentation to extract probabilistic  
123 maps of six tissue classes: gray matter (GM), white matter (WM), CSF, bone, soft tissue, and  
124 residual noise. The native space GM and WM images were submitted to diffeomorphic  
125 registration to create group template images. Each template was normalized to the MNI  
126 template using a 12-parameter affine transformation.

127

### 128 2.4. EPI image acquisition and processing

129 For the Cattell-based fMRI in Phase III of CamCAN, Gradient-Echo Echo-Planar Imaging  
130 (EPI) of 150 volumes captured 32 axial slices (sequential descending order) of thickness of 3.7  
131 mm with a slice gap of 20% for whole-brain coverage with the following parameters: TR = 1970  
132 ms; TE = 30 ms; flip angle  $\alpha = 78^\circ$ ; FOV =  $192 \times 192 \text{ mm}^2$ ; resolution =  $3 \times 3 \times 4.44 \text{ mm}^3$ , with  
133 a total duration of 5 min.

134 EPI data preprocessing included the following steps: (1) spatial realignment to adjust for  
135 linear head motion, (2) temporal realignment of slices to the middle slice, (3) coregistration to  
136 the T1 anatomical image from Phase II above, (4) application of the normalization parameters  
137 from the T1 stream above to warp the functional images into MNI space, and (5) smoothing by  
138 an 8mm Gaussian kernel.

139 For the participant-level modelling, every voxel's time-course was regressed in a multiple  
140 linear regression on the task's design matrix which consisted of time-courses for hard and easy  
141 conditions convolved with a canonical haemodynamic response function (HRF). Regressors of no  
142 interest included WM, CSF, 6 standard realignment parameters (accounting for in-scanner head  
143 motions), and harmonic regressors that capture low-frequency changes (1/128 Hz) in the signal  
144 typically associated with scanner drift and physiological noise. WM and CSF signals were  
145 estimated for each volume from the mean value of WM and CSF masks derived by thresholding  
146 SPM's tissue probability maps at 0.75. The contrast of parameter estimates for hard minus easy  
147 conditions for each voxel and participant was then calculated, termed here *Cattell activation*.

148

## 149 2.5. Arterial spinning labelling (ASL) image acquisition and processing

150 Perfusion-weighted images of cerebral blood flow used pulsed arterial spin labelling  
151 (PASL, PICORE-Q2T-PASL with background suppression). The sequence is used with the following  
152 parameters: repetition time (TR) = 2500 ms, echo time (TE) = 13 ms, field of view (FOV) = 256 ×  
153 256 × 100 mm<sup>3</sup>, 10 slices, 8 mm slice thickness, flip angle = 90°, inversion time 1 (TI1) = 700 ms,  
154 TI2 = 1800 ms, Saturation stop time = 1600 ms, tag width = 100 mm and gap = 20.9 mm, 90  
155 repetitions giving 45 control-tag pairs, voxel-size = 4 mm × 4 mm × 8 mm, 25% interslice gap,  
156 acquisition time of 3 minutes and 52 seconds. In addition, a single-shot EPI (M0) equilibrium  
157 magnetization scan was acquired. Pulsed arterial spin labelling time series were converted to  
158 maps of CBF using Explore ASL toolbox (<https://github.com/ExploreASL/ExploreASL>; Mutsaerts  
159 et al., 2018). Following rigid-body alignment, the images were coregistered with the T1 from  
160 Phase II above, normalised with normalization parameters from the T1 stream above to warp ASL  
161 images into MNI space and smoothed with a 12 mm FWHM Gaussian kernel (for more details,  
162 Tsvetanov et al., 2020b).

163

## 164 2.6. Analytical approach

165

166 To model random effects across participants, we performed voxel-wise analysis using  
167 multiple linear regression (MLR) with age as the main independent variable of interest, and sex  
168 and handedness as covariates of no interest. This MLR was applied to maps of both Cattell  
169 activation (BOLD) and baseline CBF.

170 To evaluate the confounding and performance-related effects of resting CBF on BOLD  
171 activation, we conducted commonality analysis (Nimon et al., 2008; Kraha et al., 2012).  
172 Commonality analysis partitions the variance explained by all predictors in MLR into variance  
173 unique to each predictor and variance shared between each combination of predictors.  
174 Therefore, unique effects indicate the (orthogonal) variance explained by one predictor over and  
175 above that explained by other predictors in the model, while common effects indicate the  
176 variance shared between correlated predictors. Notably, the sum of variances, also known as  
177 commonality coefficients, equals the total R<sup>2</sup> for the regression model.

178 We adapted a commonality analysis algorithm (Nimon et al., 2008) for neuroimaging  
179 analysis to facilitate voxel-wise nonparametric testing in Matlab (Mathworks,  
180 <https://uk.mathworks.com/>). The commonality analysis was applied the Cattell activation in  
181 each voxel separately (see Figure 1). The independent variables in the model were baseline CBF  
182 for the corresponding voxel, age and task performance. Covariates of no interest included sex  
183 and handedness. The model can therefore identify unique variance explained by each of the  
184 predictors ( $U_{\text{CBF}}$ ,  $U_{\text{Age}}$  and  $U_{\text{P}}$  for CBF, Age and Performance, respectively). Common effects of  
185 interest were the *confounding effects*, defined by the shared variance between CBF and age  
186 ( $C_{\text{CBF, Age}}$ ), and *performance-related effects*, defined by the common variance between CBF, Age  
187 and Performance ( $C_{\text{CBF, Age, P}}$ ). Significant clusters related to effects of interest were identified  
188 with nonparametric testing using 1000 permutations and threshold-free cluster enhancement,  
189 corrected to  $p < .05$  (Smith and Nichols, 2009). This Matlab version of commonality analysis for

190 neuroimaging with TFCE implementation is available at  
191 <https://github.com/kamentsvetanov/CommonalityAnalysis/>.

192  
193  
194

## 195 2.7. Data and code availability

196

197 The dataset analysed in this study is part of the Cambridge Centre for Ageing and  
198 Neuroscience (Cam-CAN) research project ([www.cam-can.com](http://www.cam-can.com)). Raw and minimally pre-  
199 processed MRI (i.e. from automatic analysis; Taylor et al., 2015) and behavioural data are  
200 available by submitting a data request to Cam-CAN ([https://camcan-archive.mrc-  
201 cbu.cam.ac.uk/dataaccess/](https://camcan-archive.mrc-cbu.cam.ac.uk/dataaccess/)).

202

203 Task-based fMRI data was post-processed using SPM12  
204 (<http://www.fil.ion.ucl.ac.uk/spm>; Friston et al., 2007). Arterial spin labelling data were post-  
205 processed using ExploreASL toolbox (<https://github.com/ExploreASL/ExploreASL>; Mutsaerts et  
206 al., 2018). As part of this study, MATLAB-based commonality analysis for neuroimaging with  
207 TFCE implementation was developed and made available at  
208 <https://github.com/kamentsvetanov/CommonalityAnalysis/>. Visualisation of all neuroimaging  
209 results was generated using MRICroGL (<https://github.com/rordenlab/MRICroGL>; Rorden and  
210 Brett, 2000). The corresponding author (K.A.T.) can provide custom-written analyses code on  
211 request.

212

## 213 3. Results

### 214 3.1. Main effect and effect of age on BOLD in Cattell task

215 Group-level analysis confirmed activations for the hard vs easy condition in the lateral  
216 prefrontal cortex, the anterior insula, the dorsal anterior cingulate cortex, the frontal eye field,  
217 the pre-supplementary motor area and areas along the intraparietal sulcus and lateral temporal  
218 lobe, recapitulating the multiple demand network (MND, Duncan, 2013; Camilleri et al., 2018),  
219 and the lateral occipital cortex and the calcarine cortex (Figure 2a). Additionally, we observed  
220 deactivations in the ventral medial prefrontal cortex (vmPFC), posterior cingulate cortex (PCC)  
221 and inferior parietal lobe (IPL), recapitulating the default network (Buckner et al., 2008; Raichle,  
222 2015; Buckner and DiNicola, 2019). With respect to ageing, there were weaker activations in  
223 regions of the MDN, and weaker deactivations in regions of the DMN, associated with increasing  
224 age, see Figure 2b, consistent with previous studies (Samu et al., 2017).

### 225 3.2. Main effect and effect of age on baseline CBF

226 Group-level results revealed a pattern of relatively high cerebral blood flow in cortical and  
227 subcortical brain areas associated with high perfusion and high metabolism (Henriksen et al.,  
228 2018; Figure 2c), such as caudal middle-frontal, posterior cingulate, pericalcarine, superior  
229 temporal and thalamic regions. Moderate to low CBF values in the superior-parietal and inferior-  
230 frontal areas of the cortex (Figure 2c) may reflect the axial positioning of the partial brain  
231 coverage sequence used in the study.

232 We observed age-related declines in CBF in the bilateral dorsolateral prefrontal cortex,  
233 lateral parietal cortex, anterior and posterior cingulate, pericalcarine, and cerebellum (Figure 2c)  
234 in agreement with previous reports (Chen et al., 2011; Zhang et al., 2018). Also, we observed age-  
235 related CBF increase in regions susceptible to individual and group differences in arterial transit  
236 time that can bias accuracy of CBF estimation, including middle temporal gyrus and middle  
237 cingulate cortex (Mutsaerts et al., 2017).  
238  
239

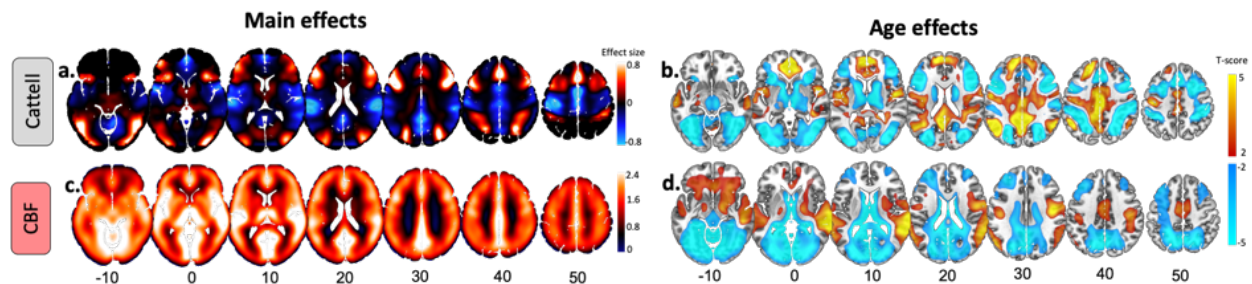

240  
241 *Figure 2. Main and age effects on task-based activity and cerebral blood flow (CBF) maps. (a) Main effects of BOLD*  
242 *activity in response to Hard vs Easy blocks with over- and under-activations shown in warm and cold colours, respectively. (b) Age-*  
243 *related decreases (cold colours) and increases (warm colours) in Cattell task. (c) Main effect of baseline CBF across all participants.*  
244 *(d) Age-related decreases (cold colours) and increases (warm colours) in baseline CBF. Slices are numbered by z level in Montreal*  
245 *Neurological Institute (MNI) space.*

### 246 3.3. Commonality analysis of BOLD Cattell activation

#### 247 3.3.1. Unique effects

248 Unique effects of individual differences in performance levels on Cattell activation (BOLD)  
249 were found in regions similar to those activated by the main effect of the Cattell task (e.g. MDN),  
250 with the exception of the lateral occipital cortex and inclusion of inferior temporal gyrus, primary  
251 visual cortex, caudate and thalamus, (cf. Figure 2a and Figure 3 top panel). Unlike the case for  
252 main effects, task-negative regions (e.g., DMN) showed small to no significant associations with  
253 performance.

254 Unique effects of age were similar but weaker to the effect of age in the model without  
255 other predictors (cf. Figure 2b and Figure 3 middle panel). Unique positive associations between  
256 CBF and Cattell activation was observed in middle frontal gyrus and cuneus regions. Negative  
257 associations were observed in insular regions, posterior cingulate cortex, bilateral angular gyrus,  
258 precentral gyrus and superior frontal gyrus.

259 Unique effects of CBF were weak, but significant, showing positive associations with  
260 activation in the middle frontal gyrus, the putamen and the cuneus. Additionally, CBF was  
261 associated negatively with activation in task negative regions, namely the angular gyrus and  
262 precentral gyrus.



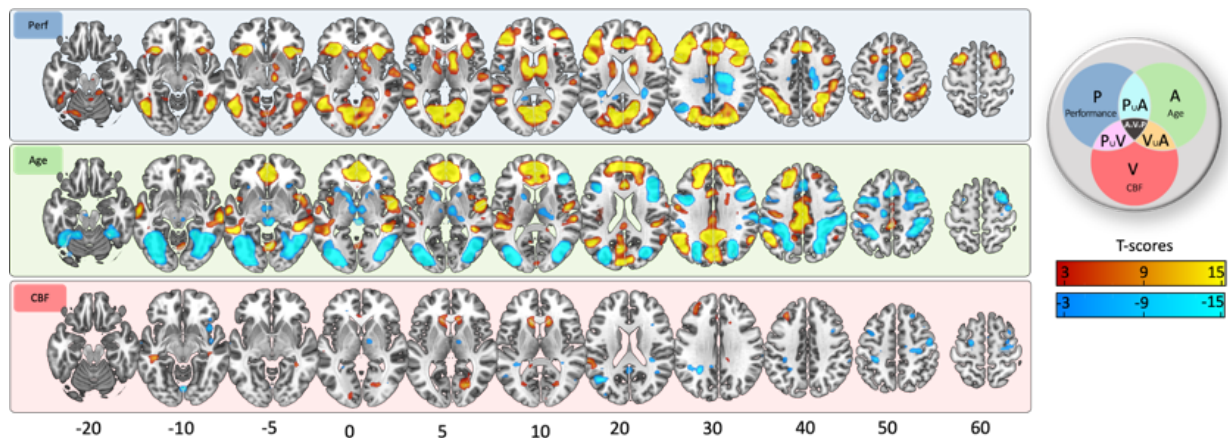

263  
264  
265  
266  
267

Figure 3. Unique effects in commonality analysis. (top panel) Age-related decreases (cold colours) and increases (warm colours). (middle panel) Performance-related decreases (cold colours) and increases (warm colours). (bottom panel) CBF-related decreases (cold colours) and increases (warm colours) in Cattell task. Slices are numbered by z level in Montreal Neurological Institute (MNI) space.

268

269

### 3.3.2. Common effects

270

271

272

273

274

There were many common effects between age and performance, with a positive commonality coefficient ( $C_{Age,P}$ , Figure 4, cyan colour), i.e. a portion of the age effects on Cattell activation was related to performance effects on Cattell activation. These effects were observed in task positive (e.g. MDN) and task negative regions (e.g. DMN), in addition to thalamus, caudate, primary motor cortex.

275

276

277

278

279

Negative commonality coefficients between performance and age were observed in the cuneus, bilateral middle frontal gyrus, anterior and middle cingulate gyrus, and bilateral superior temporal gyrus (dark blue colour in Figure 4). Negative values of commonality coefficients indicate a suppressor relationship between predictors (Zientek and Thompson, 2006), i.e. the effects of age and/or performance are stronger with their joint consideration in the model.

280

281

282

283

Confounding effects of baseline CBF on Cattell activation were characterised by the common effect between Age and CBF ( $C_{CBF,Age}$ ). Significant confounding effects were localised within posterior cingulate cortex, fusiform gyrus and inferior occipital gyrus (orange colour in Figure 4).

284

285

286

287

288

289

290

291

Performance-related effects of baseline CBF on Cattell activation were characterised by the common effect between Age, CBF and Performance ( $C_{CBF,Age,P}$ , black colour in Figure 4). Regions included intraparietal sulcus, posterior cingulate cortex, precuneus, thalamus and fusiform gyrus. Furthermore, consistent with previous findings (Tsvetanov et al., 2018), behaviourally-relevant effects were seen in inferior temporal and adjacent occipital regions, presumably due to attentional enhancement of visual representations in the more difficult conditions (Fedorenko et al., 2013).

292

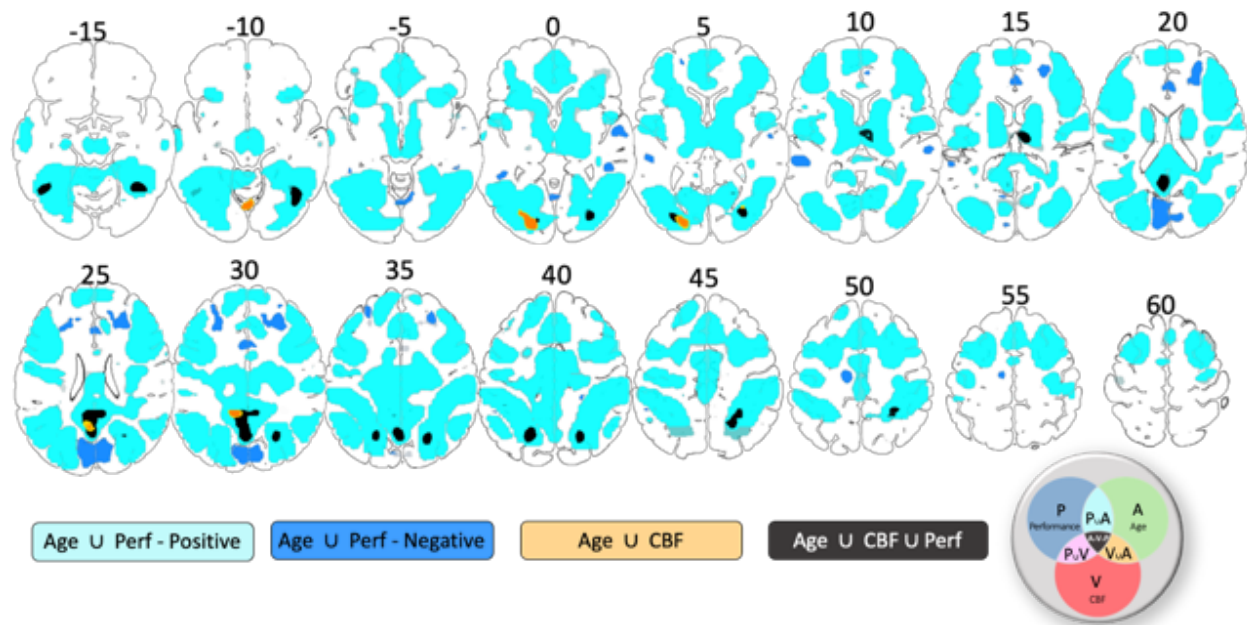

293  
294  
295  
296  
297

Figure 4. Common Effects in commonality analysis. Positive and negative common effects between age and performance are shown in cyan and dark blue colours, respectively. Common effects between age and baseline CBF are shown in orange colour. Common effects between age, performance and CBF are shown in black colour. P – performance, A – age, V – vascular, i.e. CBF. Slices are numbered by z level in Montreal Neurological Institute (MNI) space.

298

## 299 4. Discussion

300 The study confirmed the prediction that regional cerebral blood flow (CBF) can explain  
301 both performance-related and age-dependent components of the fMRI BOLD signal in parts of  
302 the multiple-demand network (MDN) associated with more complex reasoning during a common  
303 test of fluid intelligence (Cattell task). The age-dependent differences in baseline CBF also  
304 explained variance in fMRI BOLD signal in some regions that was not related to task-performance.  
305 We propose that modelling the effects of age on baseline CBF, and in general cerebrovascular  
306 and neurovascular health (Tsvetanov et al., 2021), improves the interpretation of fMRI studies,  
307 with implications for understanding brain health with ageing and disease, and that maintaining  
308 brain perfusion as we get older may have a protective effect on brain function and cognition.

309

### 310 4.1. Age differences in baseline cerebral blood flow are related to behaviour-relevant 311 Cattell BOLD activity

312 Age-related decreases in baseline cerebral blood flow (CBF), assessed with a non-invasive  
313 MR-perfusion technique, related to behaviourally relevant BOLD activity evoked by demanding  
314 problem-solving. Our findings are consistent with previous studies relating baseline CBF to  
315 performance on tasks carried outside the scanner (Bangen et al., 2014; Hays et al., 2017). We  
316 extend these lines of work by showing that baseline CBF is linked to BOLD activity, with  
317 behavioural correlation across individuals. Age-related decrease in CBF and decline in  
318 performance related to a lower range of activation in task-positive regions and less deactivation

319 of task-negative regions. Of all task-positive regions, the bilateral intra-parietal sulcus, the  
320 thalamus, and the fusiform gyrus showed significant common effects between age, CBF and  
321 performance. The intraparietal sulcus and the thalamus also showed a unique association  
322 between performance and BOLD activity, suggesting a neural origin of the effects in these  
323 regions. The processes contributing to coupling between baseline CBF and neural activity are  
324 multifaceted, probably comprising neurogenic vasodilation, cardiac output and arterial  
325 remodelling (Gaballa et al., 1998; Ohanian et al., 2014; Li et al., 2015), all of which change with  
326 age and regulate baseline and stimulus-evoked CBF (Willie et al., 2014). Establishing the relative  
327 contribution and importance of these processes warrants future research.

328 Of all task-negative regions, only the posterior cingulate cortex showed common effects  
329 between age, CBF and performance in predicting BOLD activation in the Cattell task. In this  
330 region, age-related reduction in CBF and performance correlated with less deactivation in the  
331 posterior cingulate cortex. The posterior cingulate cortex did not show unique effects between  
332 performance and BOLD activity, suggesting a mechanism different from the one observed in task-  
333 positive regions, likely reflecting a non-neuronal origin of the effects (see also “Unique effects of  
334 performance, age and CBF in Cattell task”). While the deactivation of the default network in  
335 young adults is thought to reflect suppression of neuronal activity (Fox et al., 2018), in the present  
336 study, some of the poor performing older adults showed an over-activation, not less deactivation.  
337 This again suggests a different involvement of the posterior cingulate cortex in older adults  
338 compared to young adults, for instance, signals of non-neuronal origin caused by physiological  
339 artifacts (Birn et al., 2006; Tsvetanov et al., 2021) or ‘vascular steal’ (Shmuel et al., 2002). Taken  
340 together, these findings may reflect compromised vasodilatory reserve, resulting in an inefficient  
341 redirection of resources from task-positive regions to task-negative regions in the attempt to  
342 meet higher energy demands in task-positive regions, perhaps reflecting blood flow-dependent  
343 glycolysis and oxidative metabolism. The breath of these associations is consistent with theories  
344 of vasoactive and cardiovascular regulation of cerebral blood flow (Sobczyk et al., 2014; Digernes  
345 et al., 2017).

346

#### 347 4.2. Vascular Confounding effects of CBF on task-related activity

348 Only a portion of the age differences in performance-independent BOLD activation were  
349 associated CBF decreases. Furthermore, the effects were observed in non-classical demand  
350 network task-positive and task-negative regions not showing unique associations between  
351 performance and BOLD activity, namely the fusiform gyrus and the posterior cingulate cortex  
352 (Figure 4, orange regions). This is consistent with the view that differences in baseline CBF can  
353 affect the sign and the magnitude of the evoked BOLD signal, without affecting changes in the  
354 underlying neural activity (Cohen et al., 2002; Brown et al., 2003; Stefanovic et al., 2006). We  
355 extend prior findings by showing that only a portion of the CBF effects can introduce such a  
356 behaviourally irrelevant bias; other parts of the CBF variance might be related to behaviour-  
357 relevant signal, i.e. differences in CBF could be important in their own right. Unlike the  
358 normalisation approach described in Introduction to control for CBF differences, the current  
359 commonality framework allows partition of CBF effects into effects of interest and effects of no  
360 interest. We propose that modelling the effects of age on baseline CBF, and in general  
361 cerebrovascular and neurovascular health (Tsvetanov et al., 2021), has implications for the  
362 interpretation of fMRI studies of ageing, whereby it can improve brain-behaviour relationships

363 and provide a viable mechanistic account of maintaining and improving cognitive function in old  
364 age.

365

### 366 4.3. Unique effects of performance, age and CBF on task-related activity

367

368 After accounting for age and performance, higher baseline cerebral blood flow remained  
369 significantly associated with the level of BOLD activity in cortical regions modulated by  
370 demanding problem-solving processes (Figure 3). Higher baseline CBF related to higher range of  
371 activation in task positive regions under more demanding processing, including the middle frontal  
372 gyrus, the putamen, and the cuneus. The effects were spatially adjacent or overlapping with  
373 behaviour-relevant region suggesting that higher baseline CBF may provide the conditions to  
374 upregulate activity in these regions, possibly through functional hyperaemia. Additionally, higher  
375 CBF provided higher range of deactivation in task negative regions, namely the angular gyrus and  
376 precentral gyrus. These effects were spatially adjacent or overlapping with regions showing  
377 inefficient deactivation with ageing and suggest that higher baseline CBF may facilitate  
378 suppression of activity in task-negative regions. This may reflect the effect of having an intact  
379 vasodilatory reserve (Sobczyk et al., 2014; Digernes et al., 2017). Our findings have direct  
380 implications for task-based BOLD imaging whereby higher baseline CBF levels contribute to  
381 stronger changes in BOLD signal amplitude in response to demanding cognitive conditions. The  
382 myogenic response and cardiac output are two major modulators of resting CBF (Hill et al., 2006;  
383 Meng et al., 2015), which require future consideration to establish the mechanism underlying  
384 our findings.

385 Ageing was associated with weaker activation of the multiple demand network and less  
386 efficient suppression of the default network. These effects were over and above performance  
387 and CBF, suggesting the involvement of additional factors leading to age-related difference in  
388 BOLD activity. Some factors include genetics (Shan et al., 2016), cardiovascular and neurovascular  
389 signals not captured by baseline CBF (Abdelkarim et al., 2019; Tsvetanov et al., 2021) or effects  
390 of functional connectivity captured by regional activity (Tsvetanov et al., 2018). Age differences  
391 in the shape of the haemodynamic response function (West et al., 2019) are less likely to  
392 introduce bias in the current study given its block-related fMRI design (Liu et al., 2001). The  
393 nature of these age effects should be elucidated through further investigation. The commonality  
394 analysis framework provides a useful tool for multivariate simultaneous modelling to disentangle  
395 the multifactorial nature of age-related BOLD differences.

396 After accounting for age, baseline CBF and other covariates of not interest, the level of  
397 activity in the multiple-demand regions remained positively associated with performance during  
398 the Cattell task in the scanner. Our findings are in line with previous studies during diverse  
399 demanding tasks, including manipulations of working memory, target detection, response  
400 inhibition (Fedorenko et al., 2013; Tschentscher et al., 2017; Assem et al., 2020a, 2020b). Given  
401 that both age and cerebrovascular reactivity could introduce a very strong effect on the activity-  
402 behaviour associations (even with narrow age range and healthy populations), our approach to  
403 control for these factors, in combination with the population-based, large-sample, provide the  
404 strongest evidence to date that individual differences variance in executive abilities is selectively  
405 and robustly associated with the level of activity in the multiple demand network.

406 Our study adds evidence to the nature of suppression of the default network during  
407 externally directed task (Buckner and DiNicola, 2019). The task-induced default network  
408 deactivations were consistent with previous findings in the Cattell task (Samu et al., 2017) and in  
409 general with the extent to which task conditions are cognitive demanding (Anticevic et al., 2012;  
410 Sripada et al., 2020). The effects in the default network were related to age or baseline CBF, but  
411 not uniquely related to performance, suggesting that the level of BOLD deactivations during  
412 Cattell task do not reflect individual variability in cognitive performance. The nature of default  
413 network suppression remains to be fully defined (Fox et al., 2018), but future findings about the  
414 default network cannot be interpreted independent of age and baseline CBF, at least when  
415 aiming to understand the relevance of DMN suppression in health and disease.  
416

## 417 5. Issues and future directions

418  
419 There are issues to the study. Our findings are based on a population-based cross-  
420 sectional cohort, which cannot directly speak to individual's progression over time (i.e, the ageing  
421 process). We only assessed the brain activations/co-activations, but do not quantify brain  
422 connectivity (Tsvetanov et al., 2016, 2020a; Geerligs et al., 2017; Samu et al., 2017; Bethlehem  
423 et al., 2020), even though both may change with in cognitive ageing (Tsvetanov et al., 2018). The  
424 relationship between baseline CBF and functional connectivity decouples with ageing (Galiano et  
425 al., 2019), but the behavioural relevance of such decoupling remains unclear, albeit motivated by  
426 prior work controlling for vascular effects from fMRI BOLD data (Tsvetanov et al., 2016; Geerligs  
427 et al., 2017). Future work should also i) evaluate the effects of CBF under different cognitive  
428 states (Campbell et al., 2015; Geerligs and Tsvetanov, 2016), ii) consider nonlinearities between  
429 CBF and BOLD signal within individuals (Chen, 2019) and across the lifespan (Tsvetanov et al.,  
430 2016; Tibon et al., 2021), and iii) the relevance of baseline CBF to stimulus-evoked CBF (Jennings  
431 et al., 2005) and other measures of cerebrovascular reactivity in ageing (Tsvetanov et al., 2020b)  
432 and neurodegenerative diseases (Chen, 2019).

## 433 6. Conclusion

434 We introduce a novel approach to neuroimaging that can dissociate between shared and  
435 unique signals across multiple neuroimaging modalities. Using this method, we show the effects  
436 of age on cerebral blood flow, task-related BOLD responses and performance. The results  
437 demonstrate that cerebrovascular health (i.e., baseline cerebral blood flow) explains  
438 confounding but also performance-related BOLD responses in fluid ability across the lifespan.  
439 They highlight the importance of using resting CBF data to model, rather than simply normalise  
440 for, differences in vascular health in task-based fMRI BOLD data (cf. Tsvetanov et al., 2021). Unlike  
441 the normalisation approach, our approach allows simultaneous modelling of multiple measures  
442 with independent contributions to cerebrovascular health. Here, we provide empirical evidence  
443 in support of the mechanism underlying the link between baseline CBF and neurocognitive  
444 function across the lifespan. The insights from our results may facilitate the development of new  
445 strategies to maintain cognitive ability across the life span in health and disease.  
446

## 447 7. Acknowledgements

448

449 This work is supported by the Guarantors of Brain (G101149), SCNU Study Abroad  
450 Program for Elite Postgraduate Students, the Medical Research Council  
451 (MC\_UU\_00005/12/SUAG004/051/RG91365; SUAG04/51 R101400) and the Cambridge NIHR  
452 Biomedical Research Centre (BRC-1215-20014). The views expressed are those of the authors  
453 and not necessarily those of the NIHR or the Department of Health and Social Care. For the  
454 purpose of open access, the author has applied a CC BY public copyright licence to any Author  
455 Accepted Manuscript version arising from this submission. The Cambridge Centre for Ageing and  
456 Neuroscience (Cam-CAN) research was supported by the Biotechnology and Biological Sciences  
457 Research Council (grant number BB/H008217/1). We thank the Cam-CAN respondents and their  
458 primary care teams in Cambridge for their participation in this study. Further information about  
459 the Cam-CAN corporate authorship membership can be found at

460 <https://www.cam-can.org/index.php?content=corpauth#13>.

461

## 462 8. Competing Interests statement

463

464 J.B.R. serves as an associate editor to Brain and is a non- remunerated trustee of the  
465 Guarantors of Brain, Darwin College Cambridge, and the PSP Association (UK). He has provided  
466 consultancy to Asceneuron, Biogen, UCB and has research grants from AZ-Medimmune, Janssen,  
467 Lilly and WAVE as industry partners in the Dementias Platform UK. The other authors have no  
468 disclosures.

469

## 470 9. References

471 Abdelkarim D, Zhao Y, Turner MP, Sivakolundu DK, Lu H, Rypma B (2019) A neural-vascular  
472 complex of age-related changes in the human brain: Anatomy, physiology, and implications  
473 for neurocognitive aging. *Neurosci Biobehav Rev* 107:927–944 Available at:  
474 <http://www.ncbi.nlm.nih.gov/pubmed/31499083> [Accessed September 26, 2019].

475 Addicott MA, Yang LL, Peiffer AM, Burnett LR, Burdette JH, Chen MY, Hayasaka S, Kraft RA,  
476 Maldjian JA, Laurienti PJ (2009) The effect of daily caffeine use on cerebral blood flow: How  
477 much caffeine can we tolerate? *Hum Brain Mapp* 30:3102–3114.

478 Anticevic A, Cole MW, Murray JD, Corlett PR, Wang X-J, Krystal JH (2012) The role of default  
479 network deactivation in cognition and disease. *Trends Cogn Sci* 16:584–592 Available at:  
480 <http://www.ncbi.nlm.nih.gov/pubmed/23142417> [Accessed August 2, 2013].

481 Assem M, Blank IA, Mineroff Z, Ademoğlu A, Fedorenko E (2020a) Activity in the fronto-parietal  
482 multiple-demand network is robustly associated with individual differences in working  
483 memory and fluid intelligence. *Cortex* 131:1–16.

484 Assem M, Glasser MF, Van Essen DC, Duncan J (2020b) A Domain-General Cognitive Core Defined  
485 in Multimodally Parcellated Human Cortex. *Cereb Cortex* 30:4361–4380 Available at:  
486 <https://academic.oup.com/cercor/article/30/8/4361/5815289> [Accessed June 28, 2021].

487 Bangen KJ, Nation DA, Clark LR, Harmell AL, Wierenga CE, Dev SI, Delano-Wood L, Zlatar ZZ,

- 488 Salmon DP, Liu TT, Bondi MW (2014) Interactive effects of vascular risk burden and advanced  
489 age on cerebral blood flow. *Front Aging Neurosci* 6:1–10.
- 490 Bethlehem RAI, Paquola C, Seidlitz J, Ronan L, Bernhardt B, Consortium C-C, Tsvetanov KA (2020)  
491 Dispersion of functional gradients across the adult lifespan. *Neuroimage*:117299 Available  
492 at: <https://linkinghub.elsevier.com/retrieve/pii/S1053811920307850> [Accessed August 27,  
493 2020].
- 494 Birn RM, Diamond JB, Smith M a, Bandettini P a (2006) Separating respiratory-variation-related  
495 fluctuations from neuronal-activity-related fluctuations in fMRI. *Neuroimage* 31:1536–1548  
496 Available at: <http://www.ncbi.nlm.nih.gov/pubmed/16632379> [Accessed February 28,  
497 2013].
- 498 Brown GG, Eyler Zorrilla LT, Georgy B, Kindermann SS, Wong EC, Buxton RB (2003) BOLD and  
499 perfusion response to finger-thumb apposition after acetazolamide administration:  
500 differential relationship to global perfusion. *J Cereb Blood Flow Metab* 23:829–837 Available  
501 at: <http://www.ncbi.nlm.nih.gov/pubmed/12843786> [Accessed October 1, 2019].
- 502 Buckner RL, Andrews-Hanna JR, Schacter DL (2008) The brain’s default network: anatomy,  
503 function, and relevance to disease. *Ann N Y Acad Sci* 1124:1–38 Available at:  
504 <http://www.ncbi.nlm.nih.gov/pubmed/18400922> [Accessed May 21, 2013].
- 505 Buckner RL, DiNicola LM (2019) The brain’s default network: updated anatomy, physiology and  
506 evolving insights. *Nat Rev Neurosci* 20:593–608 Available at: [www.nature.com/nrn](http://www.nature.com/nrn)  
507 [Accessed June 29, 2021].
- 508 Cabeza R, Albert M, Belleville S, Craik FIM, Duarte A, Grady CL, Lindenberger U, Nyberg L, Park  
509 DC, Reuter-Lorenz PA, Rugg MD, Steffener J, Rajah MN (2018) Maintenance, reserve and  
510 compensation: the cognitive neuroscience of healthy ageing. *Nat Rev Neurosci* 19:701–710  
511 Available at: <http://www.nature.com/articles/s41583-018-0068-2> [Accessed March 3,  
512 2019].
- 513 Camilleri JA, Müller VI, Fox P, Laird AR, Hoffstaedter F, Kalenscher T, Eickhoff SB (2018) Definition  
514 and characterization of an extended multiple-demand network. *Neuroimage* 165:138–147  
515 Available at: <https://pubmed.ncbi.nlm.nih.gov/29030105/> [Accessed December 15, 2020].
- 516 Campbell KL et al. (2015) Idiosyncratic responding during movie-watching predicted by age  
517 differences in attentional control. *Neurobiol Aging* 36:3045–3055.
- 518 Cattell RB (1971) *Abilities: Their structure growth and action*. Boston, MA: Houghton Mifflin.
- 519 Chen JJ (2019) Functional MRI of brain physiology in aging and neurodegenerative diseases.  
520 *Neuroimage* 187:209–225.
- 521 Chen JJ, Rosas HD, Salat DH (2011) Age-associated reductions in cerebral blood flow are  
522 independent from regional atrophy. *Neuroimage* 55:468–478 Available at:  
523 <http://www.sciencedirect.com/science/article/pii/S1053811910016162> [Accessed March  
524 21, 2014].
- 525 Cohen ER, Ugurbil K, Kim S-G (2002) Effect of Basal Conditions on the Magnitude and Dynamics  
526 of the Blood Oxygenation Level-Dependent fMRI Response. *J Cereb Blood Flow Metab*  
527 22:1042–1053 Available at: <http://www.ncbi.nlm.nih.gov/pubmed/12218410> [Accessed  
528 September 29, 2019].
- 529 Crittenden BM, Mitchell DJ, Duncan J (2016) Task encoding across the multiple demand cortex is  
530 consistent with a frontoparietal and cingulo-opercular dual networks distinction. *J Neurosci*  
531 36:6147–6155 Available at: <https://www.jneurosci.org/content/36/23/6147> [Accessed

- 532 December 15, 2020].
- 533 Digernes I, Bjørnerud A, Vatnehol SAS, Løvland G, Courivaud F, Vik-Mo E, Meling TR, Emblem KE  
534 (2017) A theoretical framework for determining cerebral vascular function and  
535 heterogeneity from dynamic susceptibility contrast MRI: *J Cereb Blood Flow Metab*  
536 37:2237–2248 Available at:  
537 <https://journals.sagepub.com/doi/full/10.1177/0271678X17694187> [Accessed August 13,  
538 2021].
- 539 Domino EF, Ni L, Xu Y, Koeppe RA, Guthrie S, Zubieta JK (2004) Regional cerebral blood flow and  
540 plasma nicotine after smoking tobacco cigarettes. *Prog Neuro-Psychopharmacology Biol*  
541 *Psychiatry* 28:319–327.
- 542 Duncan J (2010) The multiple-demand (MD) system of the primate brain: mental programs for  
543 intelligent behaviour. *Trends Cogn Sci* 14:172–179 Available at:  
544 <http://www.ncbi.nlm.nih.gov/pubmed/20171926> [Accessed October 17, 2013].
- 545 Duncan J (2013) The structure of cognition: attentional episodes in mind and brain. *Neuron*  
546 80:35–50.
- 547 Fedorenko E, Duncan J, Kanwisher N (2013) Broad domain generality in focal regions of frontal  
548 and parietal cortex. *Proc Natl Acad Sci U S A* 110:16616–16621 Available at:  
549 <https://pubmed.ncbi.nlm.nih.gov/24062451/> [Accessed May 19, 2021].
- 550 Folstein MF, Folstein SE, McHugh PR (1975) “Mini-mental state.” *J Psychiatr Res* 12:189–198  
551 Available at: <http://www.sciencedirect.com/science/article/pii/0022395675900266>  
552 [Accessed February 21, 2014].
- 553 Fox K, Foster B, Kucyi A, Daitch A, Parvizi J (2018) Intracranial Electrophysiology of the Human  
554 Default Network. *Trends Cogn Sci* 22:307–324 Available at:  
555 <https://pubmed.ncbi.nlm.nih.gov/29525387/> [Accessed August 20, 2021].
- 556 Friston KJ, Ashburner J, Kiebel S, Nichols T, Penny WD (2007) *Statistical parametric mapping : the*  
557 *analysis of functional brain images*. Elsevier Academic Press.
- 558 Gaballa MA, Jacob CT, Raya TE, Liu J, Simon B, Goldman S (1998) Large Artery Remodeling During  
559 Aging. *Hypertension* 32:437–443 Available at:  
560 <https://www.ahajournals.org/doi/abs/10.1161/01.HYP.32.3.437> [Accessed August 20,  
561 2021].
- 562 Galiano A, Mengual E, García de Eulate R, Galdeano I, Vidorreta M, Recio M, Riverol M, Zubieta  
563 JL, Fernández-Seara MA (2019) Coupling of cerebral blood flow and functional connectivity  
564 is decreased in healthy aging. *Brain Imaging Behav*:1–15 Available at:  
565 <http://link.springer.com/10.1007/s11682-019-00157-w> [Accessed September 26, 2019].
- 566 Geerligs L, Tsvetanov KA (2016) The use of resting state data in an integrative approach to  
567 studying neurocognitive ageing – Commentary on Campbell and Schacter (2016). *Lang Cogn*  
568 *Neurosci* 32:684–691.
- 569 Geerligs L, Tsvetanov KA, Cam-Can, Henson RN (2017) Challenges in measuring individual  
570 differences in functional connectivity using fMRI: The case of healthy aging. *Hum Brain*  
571 *Mapp*.
- 572 Grade M, Hernandez Tamames JA, Pizzini FB, Achten E, Golay X, Smits M (2015) A  
573 neuroradiologist’s guide to arterial spin labeling MRI in clinical practice. *Neuroradiology*  
574 57:1181–1202.
- 575 Hays CC, Zlatař ZZ, Campbell L, Meloy MJ, Wierenga CE (2017) Temporal gradient during famous



576 face naming is associated with lower cerebral blood flow and gray matter volume in aging.  
577 *Neuropsychologia* 107:76–83 Available at: <https://pubmed.ncbi.nlm.nih.gov/29133109/>  
578 [Accessed July 11, 2020].

579 Henriksen OM, Vestergaard MB, Lindberg U, Aachmann-Andersen NJ, Lisbjerg K, Christensen SJ,  
580 Rasmussen P, Olsen N V., Forman JL, Larsson HBW, Law I (2018) Interindividual and regional  
581 relationship between cerebral blood flow and glucose metabolism in the resting brain.  
582 <https://doi.org/10.1152/jappphysiol002762018> 125:1080–1089 Available at:  
583 <https://journals.physiology.org/doi/abs/10.1152/jappphysiol.00276.2018> [Accessed  
584 September 22, 2021].

585 Hill MA, Davis MJ, Meininger GA, Potocnik SJ, Murphy T V. (2006) Arteriolar myogenic signalling  
586 mechanisms: Implications for local vascular function. *Clin Hemorheol Microcirc* 34:67–79.

587 Horn JL, Cattell RB (1967) Age differences in fluid and crystallized intelligence. *Acta Psychol*  
588 (Amst) 26:107–129.

589 Hutchison JL, Lu H, Rypma B (2013) Neural Mechanisms of Age-Related Slowing: The  
590  $\Delta$ CBF/ $\Delta$ CMRO<sub>2</sub> Ratio Mediates Age-Differences in BOLD Signal and Human Performance.  
591 *Cereb cortex* 23:2337–2346 Available at: <http://www.ncbi.nlm.nih.gov/pubmed/22879349>  
592 [Accessed November 27, 2012].

593 Iadecola C (2004) Neurovascular regulation in the normal brain and in Alzheimer’s disease. *Nat*  
594 *Rev Neurosci* 5:347–360 Available at: <http://www.nature.com/doi/10.1038/nrn1387>  
595 [Accessed August 15, 2017].

596 Jennings JR, Muldoon MF, Ryan C, Price JC, Greer P, Sutton-Tyrrell K, Veen FM van der, Meltzer  
597 CC (2005) Reduced cerebral blood flow response and compensation among patients with  
598 untreated hypertension. *Neurology* 64:1358–1365 Available at:  
599 <https://n.neurology.org/content/64/8/1358> [Accessed August 21, 2021].

600 Kaufman AS, Horn JL (1996) Age changes on tests of fluid and crystallized ability for women and  
601 men on the Kaufman Adolescent and Adult Intelligence Test (KAIT) at ages 17-94 years. *Arch*  
602 *Clin Neuropsychol* 11:97–121.

603 Kennedy KM, Raz N (2015) Normal Aging of the Brain. In: *Brain Mapping*, pp 603–617. Elsevier.  
604 Available at: <https://linkinghub.elsevier.com/retrieve/pii/B9780123970251000683>  
605 [Accessed February 5, 2019].

606 Kievit RA et al. (2014) Distinct aspects of frontal lobe structure mediate age-related differences  
607 in fluid intelligence and multitasking. *Nat Commun* 5:5658 Available at:  
608 <http://www.nature.com/doi/10.1038/ncomms6658> [Accessed September 13, 2017].

609 Kisler K, Nelson AR, Montagne A, Zlokovic B V. (2017) Cerebral blood flow regulation and  
610 neurovascular dysfunction in Alzheimer disease. *Nat Rev Neurosci* 18:419–434 Available at:  
611 <http://www.ncbi.nlm.nih.gov/pubmed/28515434> [Accessed August 18, 2017].

612 Kraha A, Turner H, Nimon K, Zientek LR, Henson RK (2012) Tools to Support Interpreting Multiple  
613 Regression in the Face of Multicollinearity. *Front Psychol* 3:44 Available at:  
614 <http://journal.frontiersin.org/article/10.3389/fpsyg.2012.00044/abstract> [Accessed August  
615 22, 2017].

616 Leeuwis AE, Smith LA, Melbourne A, Hughes AD, Richards M, Prins ND, Sokolska M, Atkinson D,  
617 Tillin T, Jäger HR, Chaturvedi N, Flier WM van der, Barkhof F (2018) Cerebral Blood Flow and  
618 Cognitive Functioning in a Community-Based, Multi-Ethnic Cohort: The SABRE Study. *Front*  
619 *Aging Neurosci* 10:279 Available at:

- 620 <https://www.frontiersin.org/article/10.3389/fnagi.2018.00279/full> [Accessed December  
621 17, 2020].
- 622 Lemkuil BP, Drummond JC, Patel PM (2013) Central Nervous System Physiology: Cerebrovascular.  
623 Pharmacol Physiol Anesth Found Clin Appl:123–136.
- 624 Li Y, Shen Q, Huang S, Li W, Muir E, Long J, TQ D (2015) Cerebral angiography, blood flow and  
625 vascular reactivity in progressive hypertension. *Neuroimage* 111:329–337 Available at:  
626 <https://pubmed.ncbi.nlm.nih.gov/25731987/> [Accessed August 20, 2021].
- 627 Liu P, Hebrank AC, Rodrigue KM, Kennedy KM, Section J, Park DC, Lu H (2013) Age-related  
628 differences in memory-encoding fMRI responses after accounting for decline in vascular  
629 reactivity. *Neuroimage* 78:415–425 Available at:  
630 <http://www.ncbi.nlm.nih.gov/pubmed/23624491> [Accessed October 24, 2013].
- 631 Liu TT, Frank LR, Wong EC, Buxton RB (2001) Detection Power, Estimation Efficiency, and  
632 Predictability in Event-Related fMRI. *Neuroimage* 13:759–773.
- 633 Meng L, Hou W, Chui J, Han R, Gelb A (2015) Cardiac Output and Cerebral Blood Flow: The  
634 Integrated Regulation of Brain Perfusion in Adult Humans. *Anesthesiology* 123:1198–1208  
635 Available at: <https://pubmed.ncbi.nlm.nih.gov/26402848/> [Accessed August 13, 2021].
- 636 Merola A, Germuska MA, Warnert EA, Richmond L, Helme D, Khot S, Murphy K, Rogers PJ, Hall  
637 JE, Wise RG (2017) Mapping the pharmacological modulation of brain oxygen metabolism:  
638 The effects of caffeine on absolute CMRO<sub>2</sub> measured using dual calibrated fMRI.  
639 *Neuroimage* 155:331–343 Available at:  
640 <https://www.sciencedirect.com/science/article/pii/S1053811917302367?via%3Dihub>  
641 [Accessed October 7, 2019].
- 642 Mishra A, Hall CN, Howarth C, Freeman RD (2021) Key relationships between non-invasive  
643 functional neuroimaging and the underlying neuronal activity. *Philos Trans R Soc B Biol Sci*  
644 376:20190622 Available at: <https://royalsocietypublishing.org/doi/10.1098/rstb.2019.0622>  
645 [Accessed December 17, 2020].
- 646 Mutsaerts HJ, Petr J, Václavů L, van Dalen JW, Robertson AD, Caan MW, Masellis M, Nederveen  
647 AJ, Richard E, MacIntosh BJ (2017) The spatial coefficient of variation in arterial spin labeling  
648 cerebral blood flow images. *J Cereb Blood Flow Metab* 37:3184–3192 Available at:  
649 <http://www.ncbi.nlm.nih.gov/pubmed/28058975> [Accessed June 25, 2019].
- 650 Mutsaerts HJMM et al. (2018) Comparison of arterial spin labeling registration strategies in the  
651 multi-center GENetic frontotemporal dementia initiative (GENFI). *J Magn Reson Imaging*  
652 47:131–140 Available at: <http://www.ncbi.nlm.nih.gov/pubmed/28480617> [Accessed  
653 September 16, 2019].
- 654 Nimon K, Lewis M, Kane R, Haynes RM (2008) An R package to compute commonality coefficients  
655 in the multiple regression case: An introduction to the package and a practical example.  
656 *Behav Res Methods* 40:457–466.
- 657 Ohanian J, Liao A, Forman SP, Ohanian V (2014) Age-related remodeling of small arteries is  
658 accompanied by increased sphingomyelinase activity and accumulation of long-chain  
659 ceramides. *Physiol Rep* 2 Available at: </pmc/articles/PMC4098743/> [Accessed August 20,  
660 2021].
- 661 Patricia C, Henk-Jan M, Eidrees G, Marion S, Marjan A, Egill R, Francesca Benedetta P, Jorge J,  
662 Mervi K, Ritva V, António B-L, Roland W, Elna-Marie L, Eric A (2014) Review of confounding  
663 effects on perfusion measurements. *Front Hum Neurosci* 8 Available at:

664 [http://www.frontiersin.org/Community/AbstractDetails.aspx?ABS\\_DOI=10.3389/conf.fnhu](http://www.frontiersin.org/Community/AbstractDetails.aspx?ABS_DOI=10.3389/conf.fnhu)  
665 [m.2014.214.00073](http://www.frontiersin.org/Community/AbstractDetails.aspx?ABS_DOI=10.3389/conf.fnhu) [Accessed October 4, 2019].

666 Piguet O, Hornberger M, Shelley BP, Kipps CM, Hodges JR (2009) Sensitivity of current criteria for  
667 the diagnosis of behavioral variant frontotemporal dementia. *Neurology* 72:732–737.

668 Raichle ME (2015) The Brain’s Default Mode Network. *Annu Rev Neurosci*:413–427.

669 Rorden C, Brett M (2000) Stereotaxic display of brain lesions. *Behav Neurol* 12:191–200 Available  
670 at: <https://pubmed.ncbi.nlm.nih.gov/11568431/> [Accessed November 8, 2021].

671 Salthouse T (2012) Consequences of age-related cognitive declines. *Annu Rev Psychol* 63:201–  
672 226 Available at: <http://www.ncbi.nlm.nih.gov/pubmed/21740223> [Accessed November  
673 27, 2012].

674 Salthouse TA, Atkinson TM, Berish DE (2003) Executive functioning as a potential mediator of  
675 age-related cognitive decline in normal adults. *J Exp Psychol Gen* 132:566–594.

676 Samu D et al. (2017) Preserved cognitive functions with age are determined by domain-  
677 dependent shifts in network responsivity. *Nat Commun* 8:ncomms14743.

678 Shafto MA et al. (2014) The Cambridge Centre for Ageing and Neuroscience (Cam-CAN) study  
679 protocol: A cross-sectional, lifespan, multidisciplinary examination of healthy cognitive  
680 ageing. *BMC Neurol* 14.

681 Shan ZY, Vinkhuyzen AAE, Thompson PM, McMahan KL, Blokland GAM, de Zubicaray GI, Calhoun  
682 V, Martin NG, Visscher PM, Wright MJ, Reutens DC (2016) Genes influence the amplitude  
683 and timing of brain hemodynamic responses. *Neuroimage* 124:663–671.

684 Shmuel A, Yacoub E, Pfeuffer J, Van de Moortele PF, Adriany G, Hu X, Ugurbil K (2002) Sustained  
685 negative BOLD, blood flow and oxygen consumption response and its coupling to the  
686 positive response in the human brain. *Neuron* 36:1195–1210.

687 Skinner HA (1982) The drug abuse screening test. *Addict Behav* 7:363–371.

688 Smith SM, Nichols TE (2009) Threshold-free cluster enhancement: Addressing problems of  
689 smoothing, threshold dependence and localisation in cluster inference. *Neuroimage* 44:83–  
690 98 Available at: <https://pubmed.ncbi.nlm.nih.gov/18501637/> [Accessed June 21, 2021].

691 Snellen H (1862) *Probebuchstaben zur bestimmung der sehscharfe*. Utrecht: Van de Weijer.

692 Sobczyk O, Battisti-Charbonney a, Fierstra J, Mandell DM, Poublanc J, Crawley a P, Mikulis DJ,  
693 Duffin J, Fisher J a (2014) A conceptual model for CO<sub>2</sub>-induced redistribution of cerebral  
694 blood flow with experimental confirmation using BOLD MRI. *Neuroimage* 92C:56–68  
695 Available at: <http://www.ncbi.nlm.nih.gov/pubmed/24508647> [Accessed March 22, 2014].

696 Sripada C, Angstadt M, Rutherford S, Taxali A, Shedden K (2020) Toward a “treadmill test” for  
697 cognition: Improved prediction of general cognitive ability from the task activated brain.  
698 *Hum Brain Mapp* 41:3186–3197 Available at:  
699 <https://onlinelibrary.wiley.com/doi/full/10.1002/hbm.25007> [Accessed June 28, 2021].

700 Stefanovic B, Warnking JM, Rylander KM, Pike GB (2006) The effect of global cerebral vasodilation  
701 on focal activation hemodynamics. *Neuroimage* 30:726–734.

702 Sweeney MD, Kisler K, Montagne A, Toga AW, Zlokovic B V. (2018) The role of brain vasculature  
703 in neurodegenerative disorders. *Nat Neurosci* 21:1318–1331.

704 Sweeney MD, Zhao Z, Montagne A, Nelson AR, Zlokovic B V. (2019) Blood-brain barrier: From  
705 physiology to disease and back. *Physiol Rev* 99:21–78.

706 Taylor JR, Williams N, Cusack R, Auer T, Shafto MA, Dixon M, Tyler LK, Cam-Can, Henson RN (2015)  
707 The Cambridge Centre for Ageing and Neuroscience (Cam-CAN) data repository: Structural

- 708 and functional MRI, MEG, and cognitive data from a cross-sectional adult lifespan sample.  
709 Neuroimage Available at:  
710 <http://www.sciencedirect.com/science/article/pii/S1053811915008150> [Accessed  
711 September 21, 2015].
- 712 Tibon R, Tsvetanov KA, Price D, Nesbitt D, CAN C, Henson R (2021) Transient neural network  
713 dynamics in cognitive ageing. *Neurobiol Aging* 105:217–228.
- 714 Tschentscher N, Mitchell D, Duncan J (2017) Fluid intelligence predicts novel rule implementation  
715 in a distributed frontoparietal control network. *J Neurosci* 37:4841–4847.
- 716 Tsvetanov KA et al. (2020a) Brain functional network integrity sustains cognitive function despite  
717 atrophy in presymptomatic genetic frontotemporal dementia. *Alzheimer’s*  
718 *Dement:alz.12209* Available at: <https://onlinelibrary.wiley.com/doi/10.1002/alz.12209>  
719 [Accessed December 9, 2020].
- 720 Tsvetanov KA, Henson RNA, Jones PS, Mutsaerts H, Fuhrmann D, Tyler LK, Rowe JB (2020b) The  
721 effects of age on resting-state BOLD signal variability is explained by cardiovascular and  
722 cerebrovascular factors. In: *Psychophysiology*. Blackwell Publishing Inc. Available at:  
723 <https://onlinelibrary.wiley.com/doi/full/10.1111/psyp.13714> [Accessed December 9,  
724 2020].
- 725 Tsvetanov KA, Henson RNA, Rowe JB (2021) Separating vascular and neuronal effects of age on  
726 fMRI BOLD signals. *Philos Trans R Soc London Ser B, Biol Sci* 376:20190631.
- 727 Tsvetanov KA, Henson RNA, Tyler LK, Davis SW, Shafto MA, Taylor JR, Williams N, Rowe JB (2015)  
728 The effect of ageing on fMRI: Correction for the confounding effects of vascular reactivity  
729 evaluated by joint fMRI and MEG in 335 adults. *Hum Brain Mapp* 36:2248–2269 Available  
730 at: <http://www.ncbi.nlm.nih.gov/pubmed/25727740> [Accessed February 27, 2015].
- 731 Tsvetanov KA, Henson RNA, Tyler LK, Razi A, Geerligs L, Ham TE, Rowe JB (2016) Extrinsic and  
732 intrinsic brain network connectivity maintains cognition across the lifespan despite  
733 accelerated decay of regional brain activation. *J Neurosci* 36:3115–3126.
- 734 Tsvetanov KA, Ye Z, Hughes L, Samu D, Treder MS, Wolpe N, Tyler LK, Rowe JB, for Cambridge  
735 Centre for Ageing and Neuroscience (2018) Activity and connectivity differences underlying  
736 inhibitory control across the adult lifespan. *J Neurosci* 38:7887–7900 Available at:  
737 <http://www.ncbi.nlm.nih.gov/pubmed/30049889> [Accessed August 1, 2018].
- 738 United Nations D of E and SAPD (2020) World Population Ageing 2019.
- 739 West KL, Zuppichini MD, Turner MP, Sivakolundu DK, Zhao Y, Abdelkarim D, Spence JS, Rypma B  
740 (2019) BOLD hemodynamic response function changes significantly with healthy aging.  
741 *Neuroimage* 188:198–207.
- 742 Willie CK, Tzeng Y-C, Fisher JA, Ainslie PN (2014) Integrative regulation of human brain blood flow.  
743 *J Physiol* 592:841–859 Available at: <http://www.ncbi.nlm.nih.gov/pubmed/24396059>  
744 [Accessed October 1, 2019].
- 745 Woolgar A, Bor D, Duncan J (2013) Global increase in task-related fronto-parietal activity after  
746 focal frontal lobe lesion. *J Cogn Neurosci* 25:1542–1552.
- 747 Woolgar A, Duncan J, Manes F, Fedorenko E (2018) Fluid intelligence is supported by the multiple-  
748 demand system not the language system. *Nat Hum Behav* 2:200–204 Available at:  
749 <https://pubmed.ncbi.nlm.nih.gov/31620646/> [Accessed December 15, 2020].
- 750 Yarchoan M, Xie SX, Kling MA, Toledo JB, Wolk DA, Lee EB, Van Deerlin V, Lee VMY, Trojanowski  
751 JQ, Arnold SE (2012) Cerebrovascular atherosclerosis correlates with Alzheimer pathology

752           in neurodegenerative dementias. *Brain* 135:3749–3756.  
753 Zhang N, Gordon ML, Ma Y, Chi B, Gomar JJ, Peng S, Kingsley PB, Eidelberg D, Goldberg TE (2018)  
754 The Age-Related Perfusion Pattern Measured With Arterial Spin Labeling MRI in Healthy  
755 Subjects. *Front Aging Neurosci* 10:214 Available at:  
756 <http://www.ncbi.nlm.nih.gov/pubmed/30065646> [Accessed July 9, 2019].  
757 Zientek LR, Thompson B (2006) Commonality analysis: Partitioning variance to facilitate better  
758 understanding of data. *J Early Interv* 28:299–307 Available at:  
759 <https://journals.sagepub.com/doi/abs/10.1177/105381510602800405?journalCode=jeib>  
760 [Accessed June 21, 2021].  
761 Zlokovic B V (2011) Neurovascular pathways to neurodegeneration in Alzheimer’s disease and  
762 other disorders. *Nat Rev Neurosci* 12:723–738 Available at:  
763 <http://www.ncbi.nlm.nih.gov/pubmed/22048062> [Accessed August 19, 2017].  
764

## 1 10. Figure Legends

2 Figure 1. Summary of the analytical pipeline.

3

4 Figure 2. Main and age effects on task-based activity and cerebral blood flow (CBF) maps.

5 (a) Main effects of BOLD activity in response to Hard vs Easy blocks with over- and  
6 underactivations shown in warm and cold colours, respectively. (b) Age-related decreases (cold  
7 colours) and increases (warm colours) in Cattell task. (c) Main effect of baseline CBF across all  
8 participants. (d) Age-related decreases (cold colours) and increases (warm colours) in baseline  
9 CBF. Slices are numbered by z level in Montreal Neurological Institute (MNI) space.

10

11

12 Figure 3. Unique effects in commonality analysis. (top panel) Age-related decreases (cold  
13 colours) and increases (warm colours). (middle panel) Performance-related decreases (cold  
14 colours) and increases (warm colours). (bottom panel) CBF-related decreases (cold colours) and  
15 increases (warm colours) in Cattell task. Slices are numbered by z level in Montreal Neurological  
16 Institute (MNI) space.

17

18

19 Figure 4. Common Effects in commonality analysis. Positive and negative common effects  
20 between age and performance are shown in cyan and dark blue colours, respectively. Common  
21 effects between age and baseline CBF are shown in orange colour. Common effects between age,  
22 performance and CBF are shown in black colour. P – performance, A – age, V – vascular, i.e. CBF.  
23 Slices are numbered by z level in Montreal Neurological Institute (MNI) space.

1

## 2 11. Tables

3

4

Table 1. Participants' demographic information

| N=223                   | Decile   |         |         |        |         |        |         |
|-------------------------|----------|---------|---------|--------|---------|--------|---------|
|                         | 1        | 2       | 3       | 4      | 5       | 6      | 7       |
| Age range [years]       | 19-27    | 28-37   | 38-47   | 48-57  | 58-67   | 68-77  | 78-87   |
| Numbers                 | 21       | 39      | 37      | 35     | 35      | 30     | 26      |
| Gender                  |          |         |         |        |         |        |         |
| Male                    | 9        | 19      | 18      | 17     | 18      | 16     | 14      |
| Female                  | 12       | 20      | 19      | 18     | 17      | 14     | 12      |
| Handedness <sup>a</sup> |          |         |         |        |         |        |         |
| Mean/SD                 | 79/44    | 89/25   | 81/27   | 94/11  | 77/50   | 95/10  | 87/33   |
| Range[min/max]          | -100/100 | -56/100 | -56/100 | 58/100 | -78/100 | 53/100 | -56/100 |
| Education <sup>b</sup>  |          |         |         |        |         |        |         |
| None                    | 0        | 0       | 0       | 0      | 0       | 5      | 1       |
| GCSE                    | 2        | 2       | 6       | 3      | 3       | 3      | 3       |
| A-level                 | 4        | 1       | 3       | 11     | 9       | 8      | 9       |
| University              | 15       | 36      | 28      | 21     | 23      | 14     | 13      |

5

6

7 <sup>a</sup> Higher scores indicate greater right-hand preference, as assessed by Edinburgh Handedness  
8 Inventory (Oldfield, 1971).

9 <sup>b</sup> Categorized according to the British education system: "None" = no education over the age of 16  
10 yrs; "GCSE" = General Certificate of Secondary Education; "A Levels" = General Certificate of Education  
11 Advanced Level; "University" = undergraduate or graduate degree.

12

13

14
